# Supplementary material for: Multi-omic cross-sectional cohort study of pre-malignant Barrett’s esophagus reveals early structural variation and retrotransposon activity
Source: PubMed Central journal article supplement (PMC8931005; doi:10.1038/s41467-022-28237-4), 2022-03-17

**Figure S4**

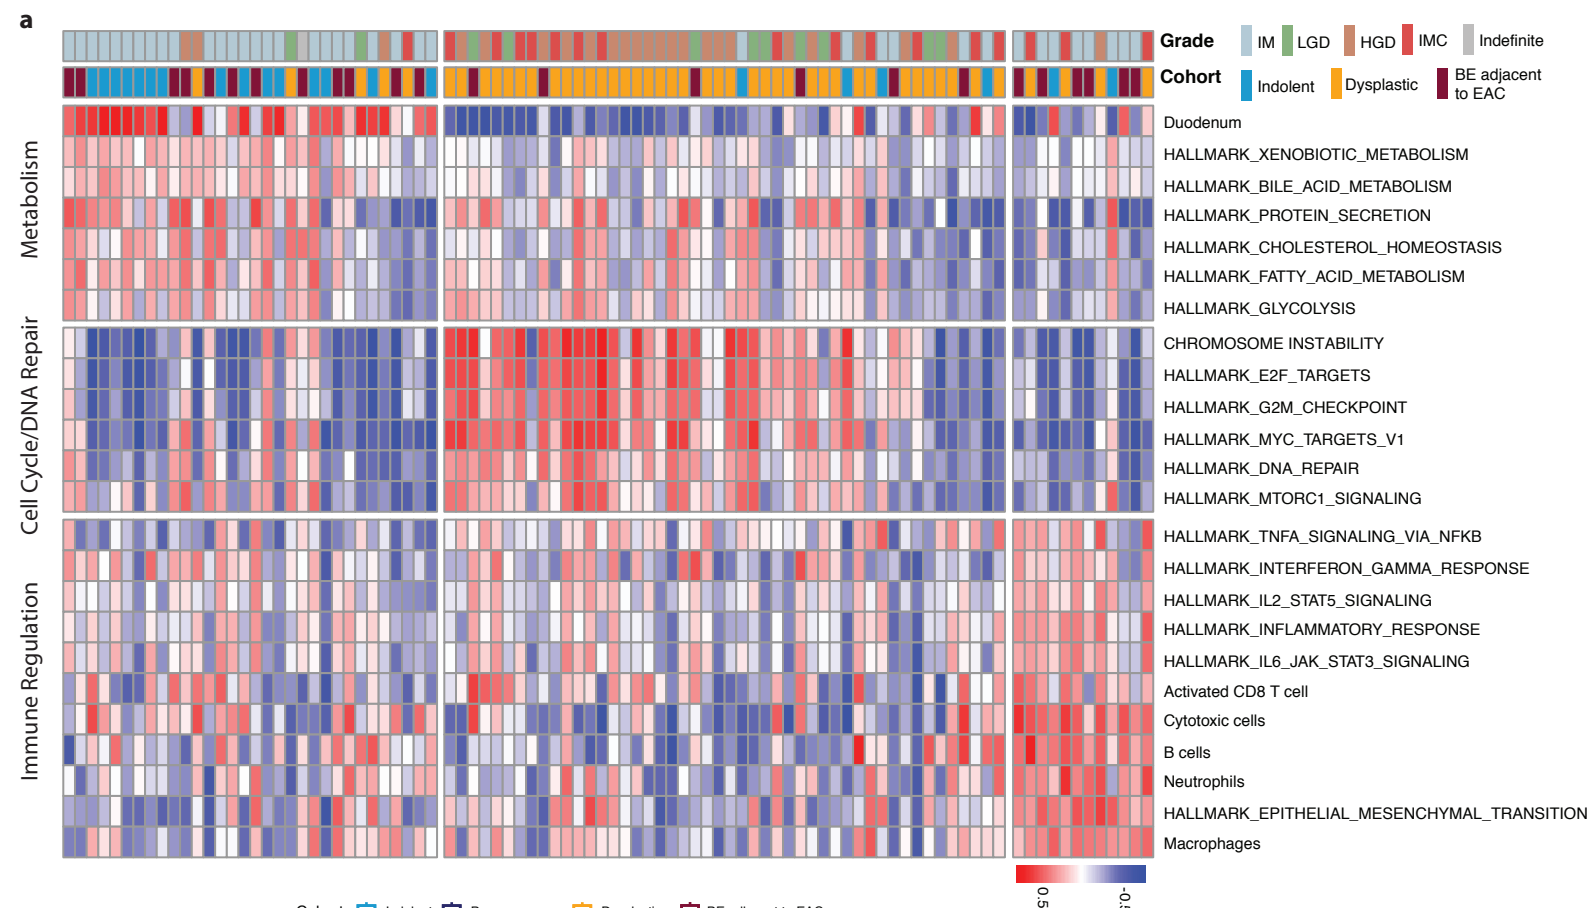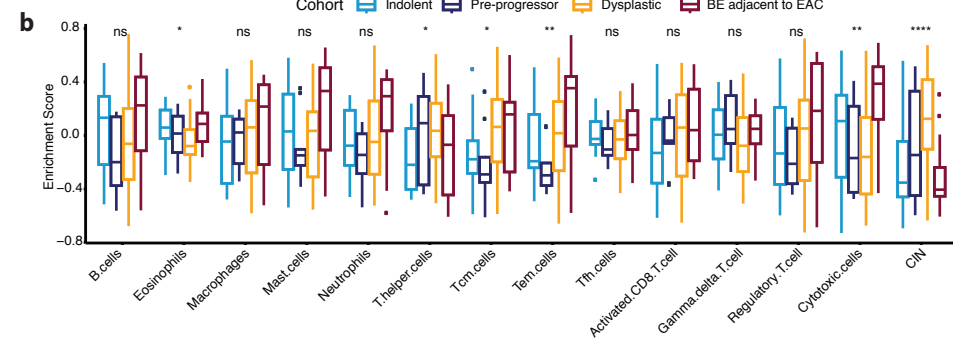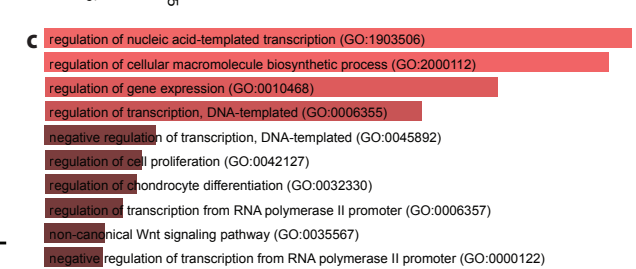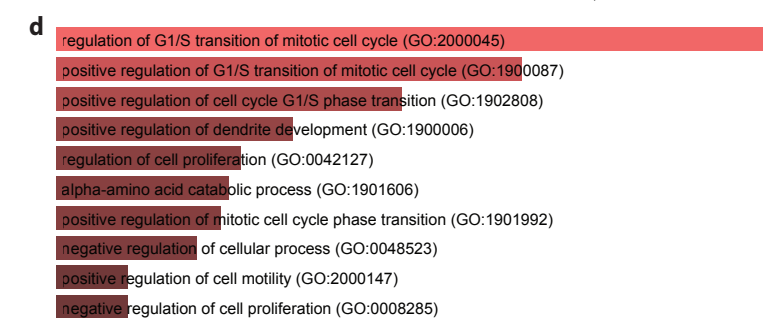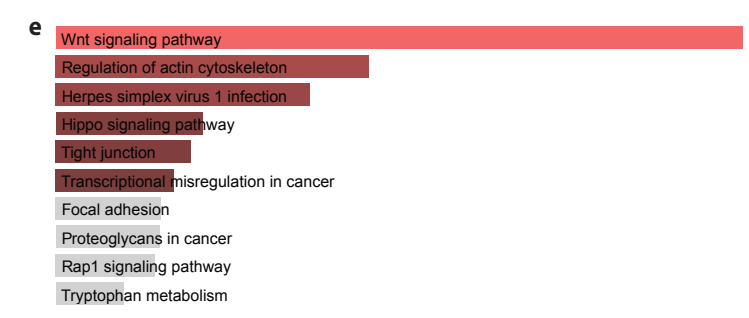

Supplement: 41467_2022_28237_MOESM6_ESM.pdf [file 41467_2022_28237_MOESM6_ESM.pdf]
